# Supplementary material for: Phylogenomic analysis of the family Peptostreptococcaceae (Clostridium cluster XI) and proposal for reclassification of Clostridium litorale (Fendrich et al. 1991) and Eubacterium acidaminophilum (Zindel et al. 1989) as Peptoclostridium litorale gen. nov. comb. nov. and Peptoclostridium acidaminophilum comb. nov
Source: PubMed Central journal article supplement (PMC5244501; doi:10.1099/ijsem.0.001548), 2016-12
Supplement: ijsem-66-1548-s001.pdf [file ijsem-66-1548-s001.pdf]

## Supplementary Material

to “Phylogenomic analysis of the family *Peptostreptococcaceae* (Clostridium cluster XI)...”

by Michael Y. Galperin, Vyacheslav Brover, Igor Tolstoy, and Natalya Yutin.

### Phylogenetic methods

#### 1. 16S rRNA gene-based tree

The 16S rRNA gene sequences were obtained from GenBank (Benson *et al.*, 2015), based on the entries for type strains as listed in LPSN, StrainInfo, and SILVA databases (Parte, 2014; Verslyppe *et al.*, 2014; Yilmaz *et al.*, 2014) and referred to by the NCBI RefSeq Targeted Loci project (Federhen, 2015). The last database access date was July 1<sup>st</sup>, 2016. Sequences were aligned with MUSCLE (Edgar, 2004) as implemented in the MEGA6 software suite (Tamura *et al.*, 2013) and the phylogenetic tree on Figure 1 was constructed by applying the maximum likelihood method to the initial tree obtained using neighbor-joining algorithm (Figure S1).

#### 2. Protein-based trees

Protein-based and whole-genome-based trees relied on the complete genomes and genomic DNA assemblies of various members of the *Peptostreptococcaceae* and protein sequences translated from them (Table S1). An alignment of 50 ribosomal proteins was constructed as described earlier (Yutin *et al.*, 2012; Yutin & Galperin, 2013), using concatenated sequences of L1-L7, L9-L11, L13-L24, L27-L29, L31-L36, and S2-S20 proteins from each organism (including new translations of the L36 proteins that had been missed in the genome annotations of [*Clostridium*] *hiranonis* DSM 13275<sup>T</sup> and [*Clostridium*] *litorale* DSM 5388<sup>T</sup>). Ribosomal protein sequences were aligned by MUSCLE (Edgar, 2004), the alignments were concatenated, and the resulting 6,269-position alignment was used for phylogenetic reconstruction. The phylogenetic tree was constructed using the PhyML program (Guindon *et al.*, 2010), the latest version of which (<http://www.atgc-montpellier.fr/phyml-sms/>) includes automatic selection of the best-fit substitution model for a given alignment. The best model identified by PhyML was LG +G6 +I +F. LG, Le-Gascuel matrix; G6 +I +F, Gamma shape parameter: fixed; number of categories: 6; Proportion of Invariable sites: fixed; Equilibrium frequencies: empirical. Branch support values were calculated from 100 independent runs. Maximum likelihood trees for RpoB and GyrB were constructed with MEGA6 (Tamura *et al.*, 2013).

### 3. Whole-genome-based trees

For genome-based trees, we performed BLAST comparisons between each pair of genomes (DNA assemblies), using MegaBLAST (BLASTN 2.3.1+, Morgulis *et al.*, 2008) run with default parameters, except for several minor changes specified in the legend to Figure S3A and that the high-scoring segments (HSPs) in the output were filtered to prevent multiple hits from the same DNA segment. BLAST results were used to determine the alignment fraction (AF), the percentage of conserved DNA shared by the two genomes, following the principles described by Goris *et al.* (2007), Deloger *et al.* (2009), and Varghese *et al.* (2015). For distantly related organisms (members of different genera), we calculated on the fraction of each genome that contributed to the pairwise alignment, as proposed by Deloger *et al.* (2009). Briefly, the MegaBLAST-reported fraction of the aligned DNA was compared to the total length of genomic DNA for each strain; these values were averaged for each genome pair, converted to distance measures, and used to construct a neighbor-joining tree. These values were also plotted as a two-dimensional display of the results obtained by multi-dimensional scaling (Brover *et al.*, manuscript in preparation).

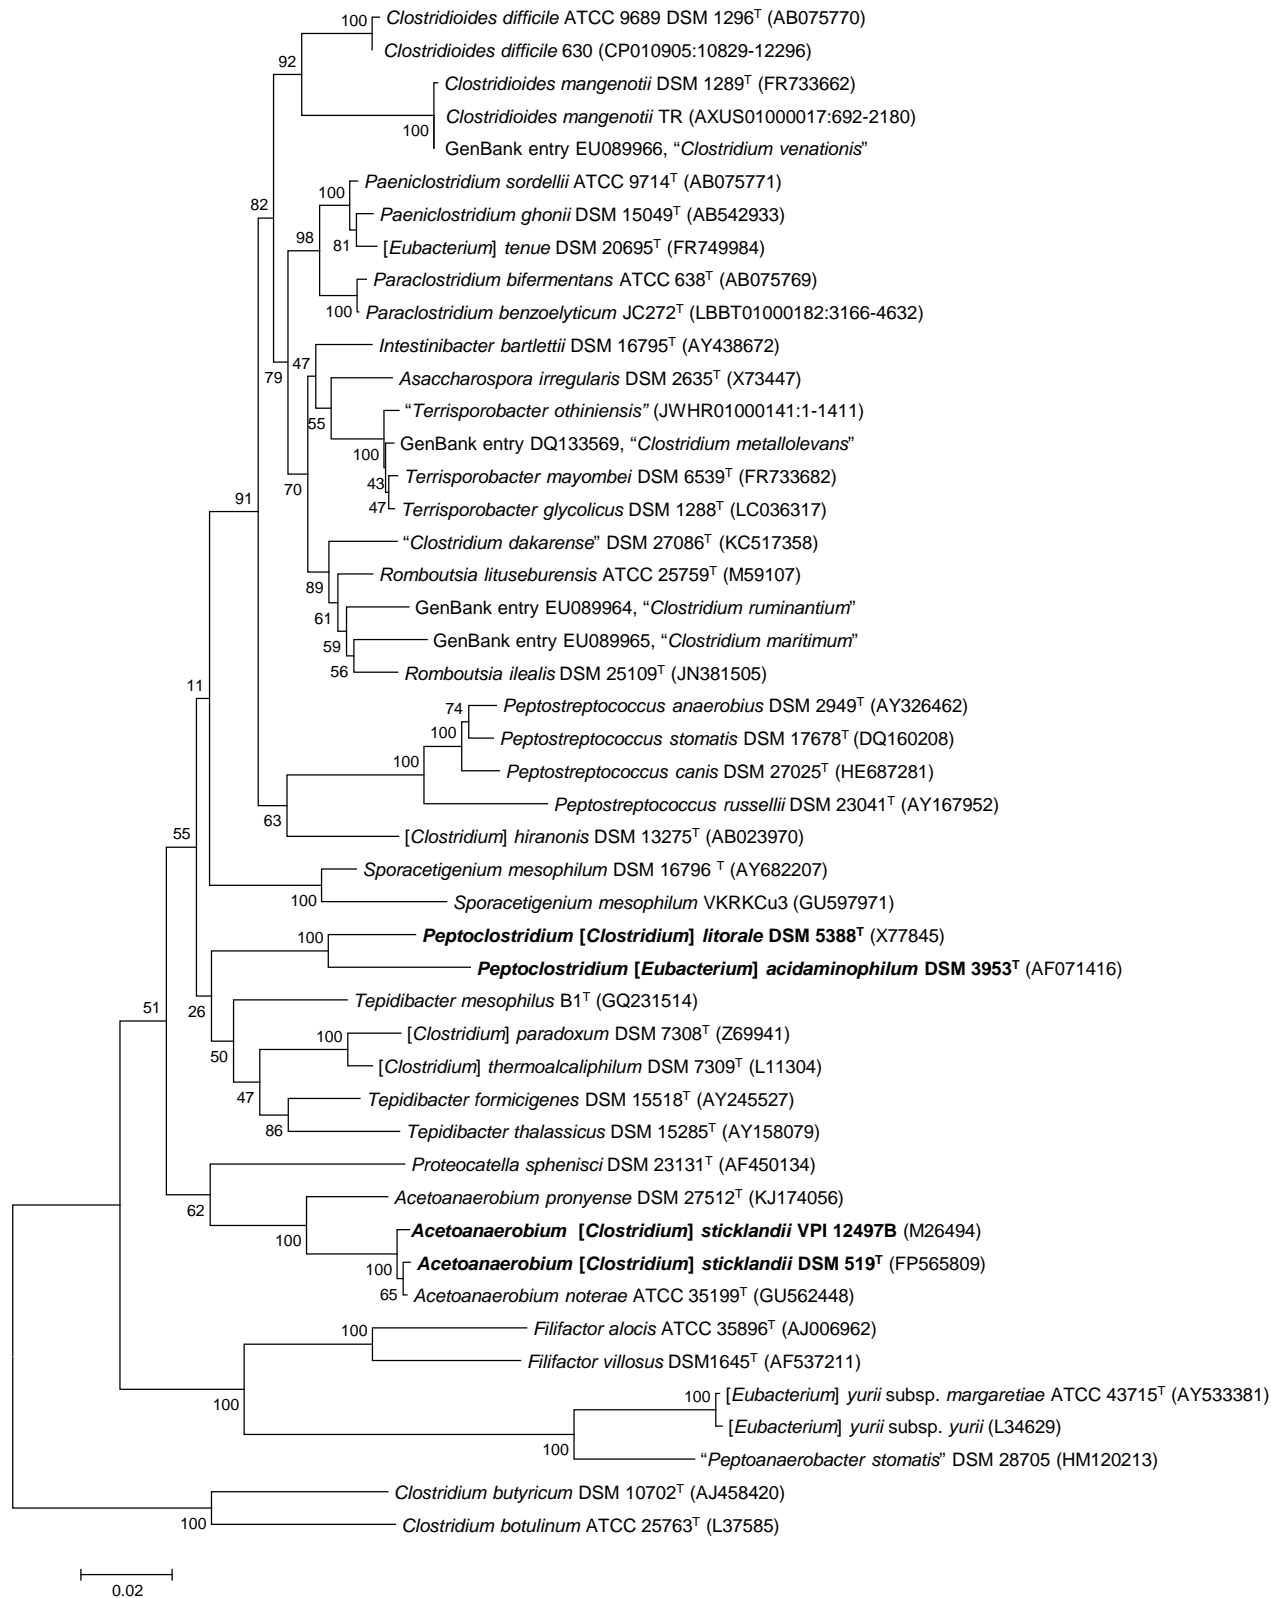

**Figure S1. A neighbor-joining tree of 16S rRNA genes from *Peptostreptococcaceae* members.** The tree was built using MEGA6 and rooted with sequences from *C. botulinum* and *C. butyricum*. GenBank accession numbers for 16S rRNA gene sequences are listed in parentheses. The names of the organisms reclassified in this work are shown in bold. The names of organisms that have not been validly published are in quotation marks, sequences from organisms that have not been deposited in culture collections are listed under their GenBank entries.

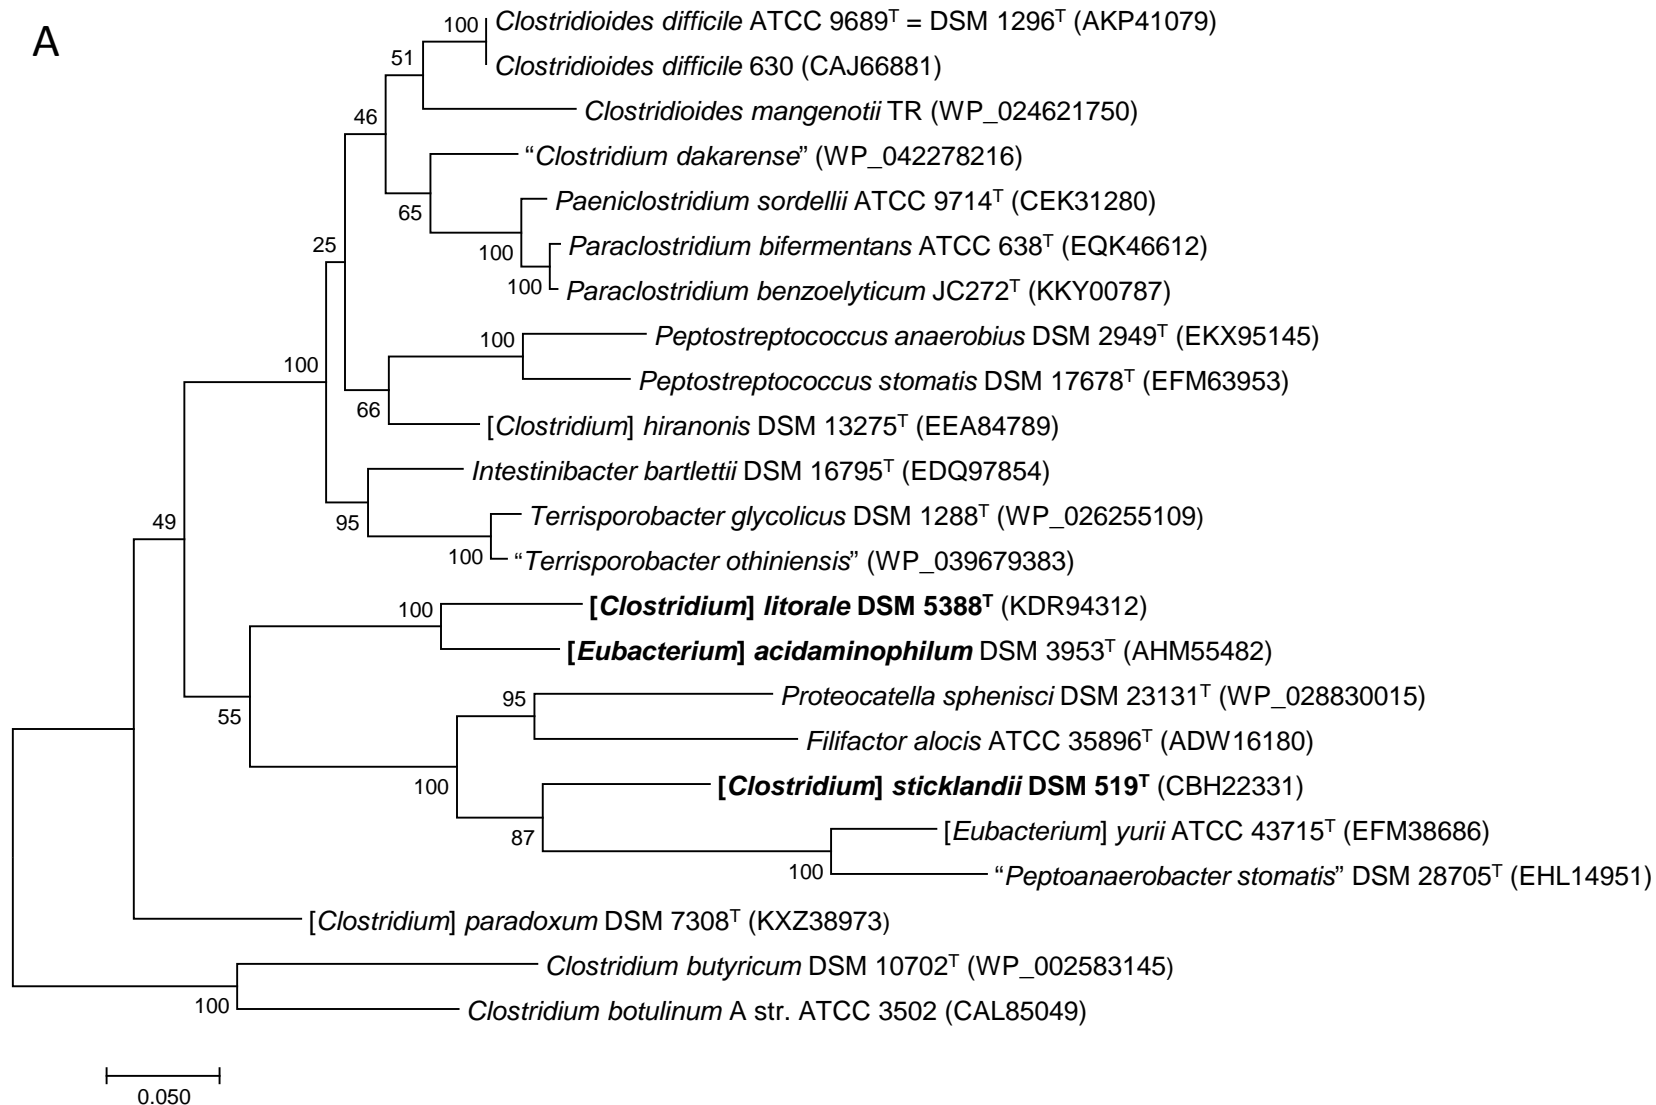

**Figure S2. Maximum likelihood trees for DNA-directed RNA polymerase beta subunit (RpoB, panel A, 1182 positions) and DNA gyrase subunit B (GyrB, panel B, 626 positions).** The sequences were taken from GenBank (where available, CDS id's are in parentheses) or from NCBI's RefSeq, aligned with MUSCLE and ML trees were constructed with MEGA6 by applying Neighbor-Joining and BioNJ algorithms to a matrix of pairwise distances estimated using a JTT-based model. Protein accession numbers are shown in parentheses. Organisms proposed for renaming are in bold, quotation marks indicate the species that had not been validly described at the time of this writing.

B

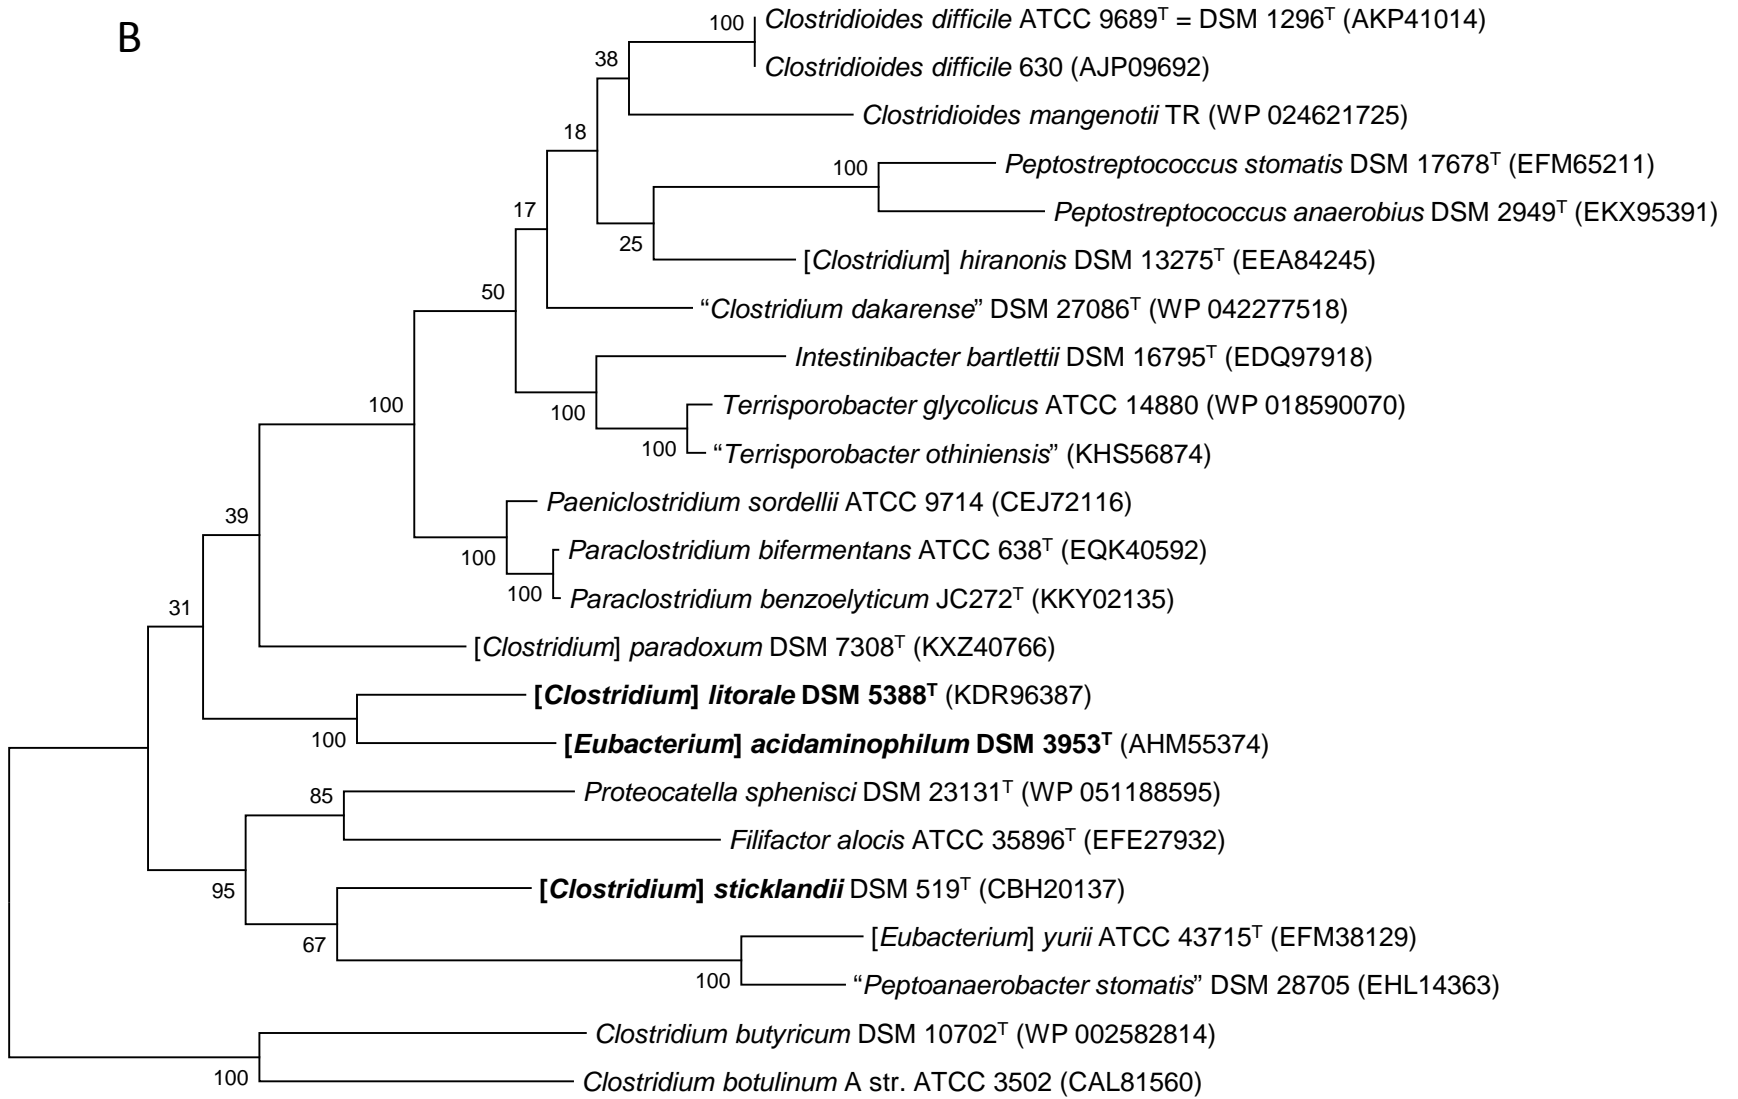

0.050

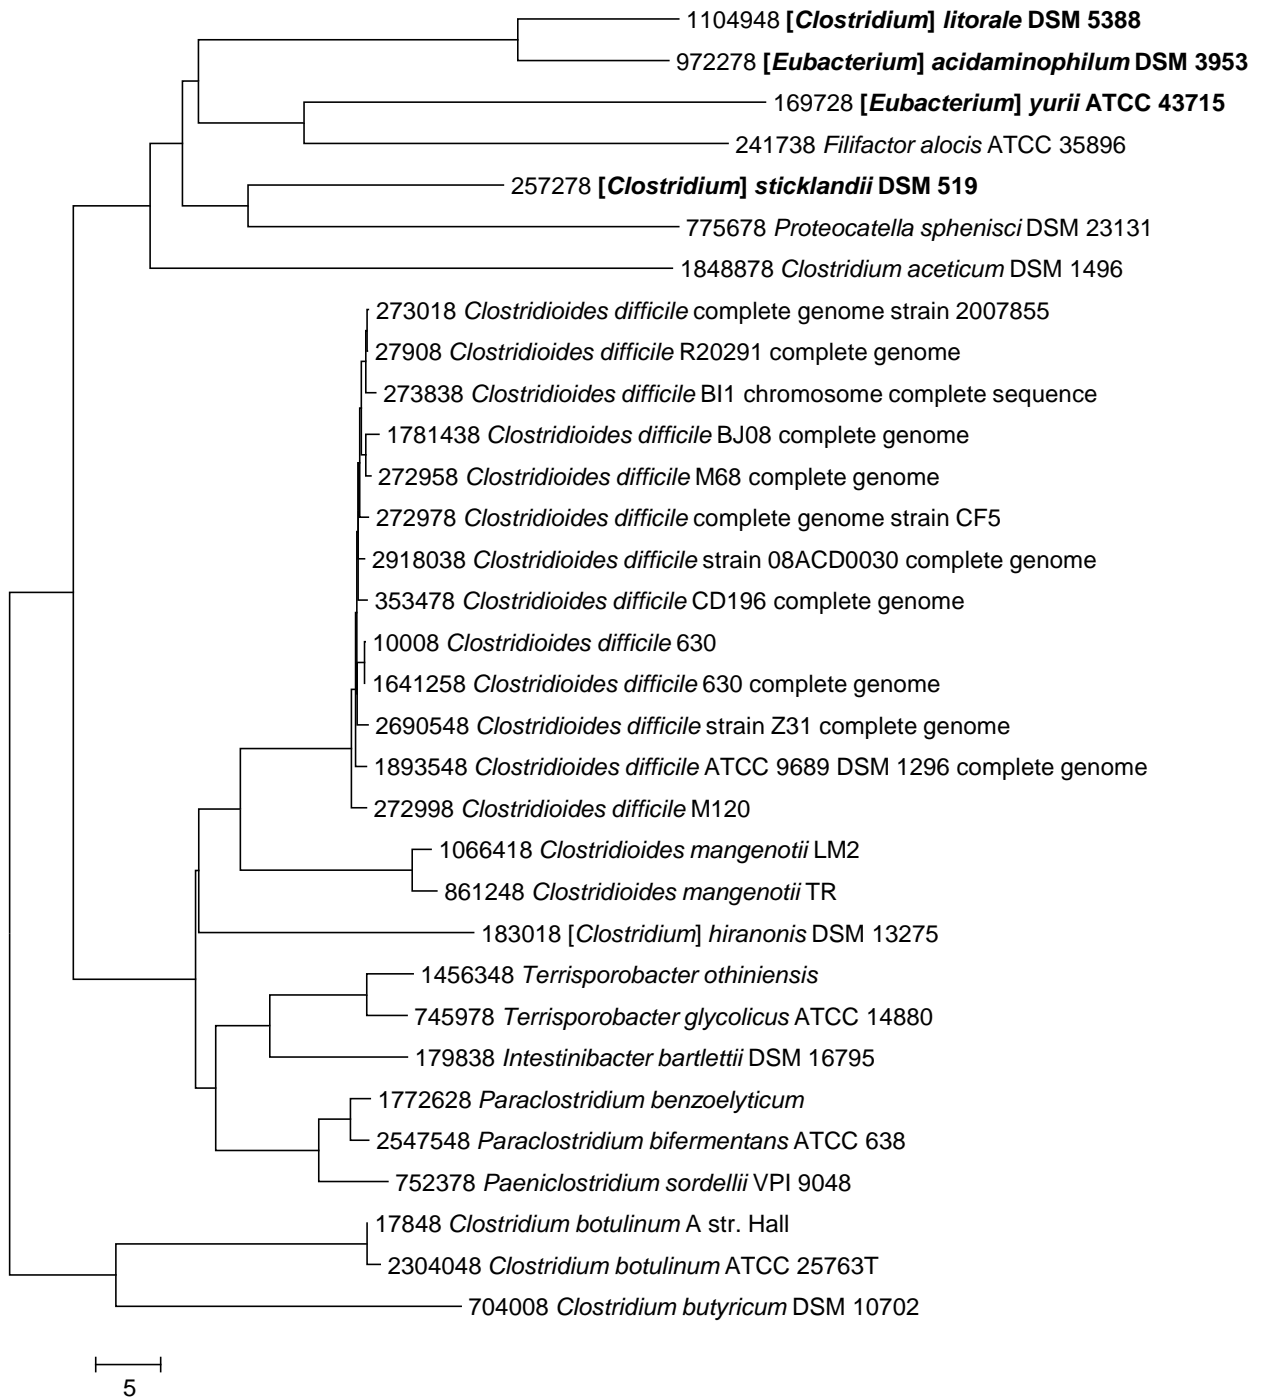

**Figure S3. A tree based on whole-genome alignments (A) and its visualization using principal components analysis (B).** The tree is based on the “conservation” scores, derived from the BLAST scores of pairwise genome alignments and rooted with genomes of *Clostridium botulinum* and *C. butyricum*. The numbers in front of the organism names indicate genomic entries in the NCBI Assembly database, e.g. 1104948 for *C. litorale* indicates [www.ncbi.nlm.nih.gov/assembly/1104948](http://www.ncbi.nlm.nih.gov/assembly/1104948).

Pairwise genome alignments were obtained using MegaBLAST with the following parameters: -max\_target\_seqs 100000; -xdrop\_gap 150; -penalty -1; -gapopen 3; -gapextend 1; -dbsize 10000000; -searchsp 10000000. Aligned genome segments of < 60 bp have been ignored; aligned segments separated by < 400 bp have been merged to form “conserved segments”. For each genome, the “conservation” value C has been calculated as the total length of the conserved segments divided by the total length of all available DNA in a genome assembly. The distance  $d_{\text{cons}}$  between genomes 1 and 2 was calculated as  $d_{\text{cons}} = -10 * (\log C1 + \log C2)$  and used to build a tree using the neighbor-joining algorithm implemented in the NCBI Genome Workbench <http://www.ncbi.nlm.nih.gov/tools/gbench/>.

## Peptostreptococcaceae

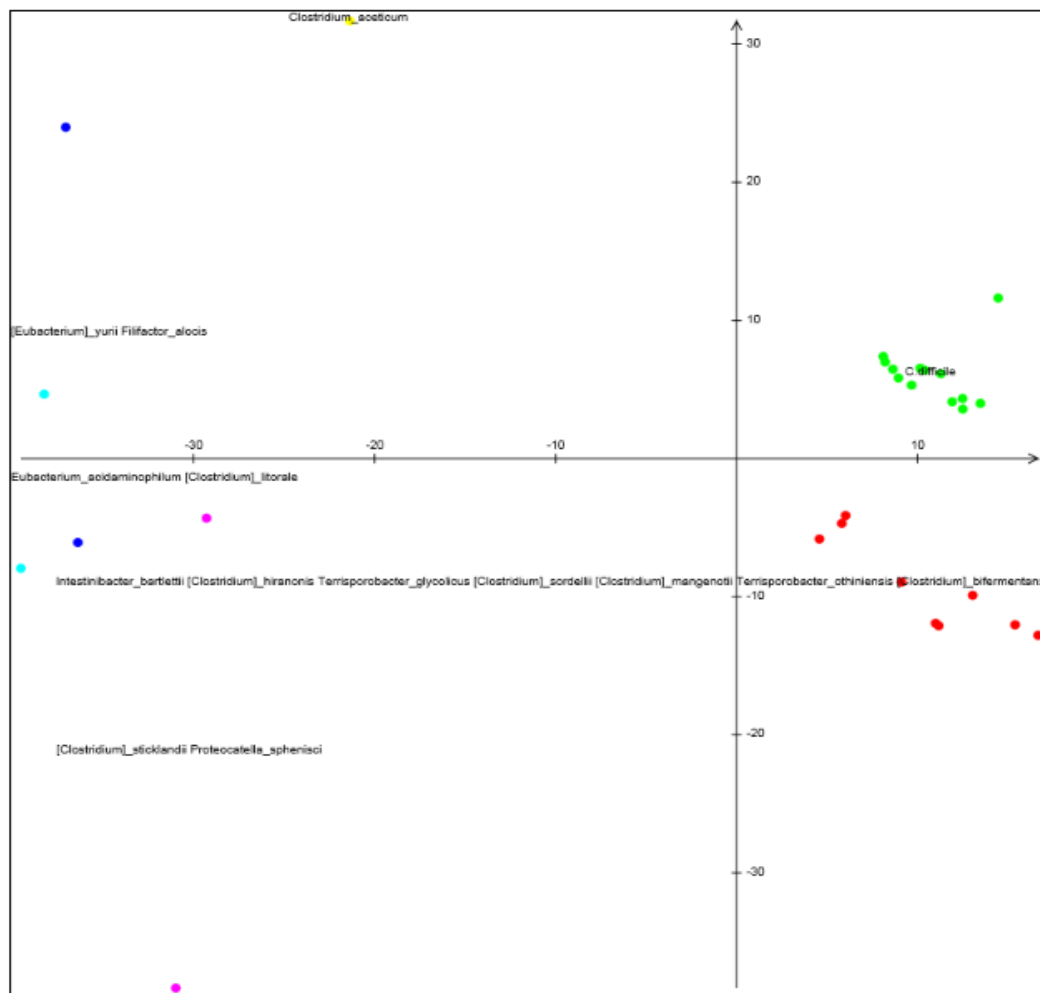

### Principal Components

| Axis | % Explained Distances | % Total |
|------|-----------------------|---------|
| 1    | 37                    | 37      |
| 2    | 16                    | 53      |
| 3    | 15                    | 68      |
| 4    | 10                    | 78      |

### Clusters

| Cluster | # Points | Species                                                                                                                                                                                                      |
|---------|----------|--------------------------------------------------------------------------------------------------------------------------------------------------------------------------------------------------------------|
| 1       | 2        | [Eubacterium]_yurii(1) Filifactor_alocis(1)                                                                                                                                                                  |
| 2       | 13       | C.difficile                                                                                                                                                                                                  |
| 3       | 2        | Eubacterium_acidaminophilum(1) [Clostridium]_litorale(1)                                                                                                                                                     |
| 4       | 9        | Intestinibacter_bartlettii(1) [Clostridium]_hiranonis(1) Terrisporobacter_glycolicus(1) [Clostridium]_sordellii(1) [Clostridium]_mangenotii(2) Terrisporobacter_othiniensis(1) [Clostridium]_bifermentans(1) |
| 5       | 2        | [Clostridium]_sticklandii(1) Proteocatella_sphenisci(1)                                                                                                                                                      |
| 6       | 1        | Clostridium_aceticum                                                                                                                                                                                         |

**Figure S3B. Pairwise distances obtained from whole-genome alignments visualized using principal component analysis.** The dots in cyan correspond to the cluster formed by *C. litorale* and *E. acidaminophilum*.

**Table S1. Genome sequences of the members of the *Peptostreptococcaceae*<sup>a</sup>**

| Organism name <sup>b</sup>                                                                                | Genome size, kb | Pro-teins | %GC  | Genome ID             | GenBank accession, reference                                                    |
|-----------------------------------------------------------------------------------------------------------|-----------------|-----------|------|-----------------------|---------------------------------------------------------------------------------|
| <b>Complete genomes</b>                                                                                   |                 |           |      |                       |                                                                                 |
| <i>Clostridioides difficile</i> DSM 1296 <sup>T</sup>                                                     | 4,213           | 3,782     | 28.8 | <a href="#">535</a>   | CP011968 (Riedel <i>et al.</i> , 2015)                                          |
| <i>Clostridioides difficile</i> 630                                                                       | 4,298           | 3,767     | 29.1 | <a href="#">535</a>   | AM180355 (Sebahia <i>et al.</i> , 2006; Monot <i>et al.</i> , 2011)             |
| [ <i>Clostridium</i> ] <i>sticklandii</i> DSM 519 <sup>T</sup>                                            | 2,715           | 2,476     | 33.3 | <a href="#">1723</a>  | FP565809 (Fonknechten <i>et al.</i> , 2010)                                     |
| [ <i>Eubacterium</i> ] <i>acidaminophilum</i> DSM 3953 <sup>T</sup>                                       | 3,055           | 2,789     | 44.0 | <a href="#">31356</a> | CP007452 (Poehlein <i>et al.</i> , 2014b)                                       |
| <i>Filifactor alocis</i> ATCC 35896 <sup>T</sup>                                                          | 1,931           | 1,644     | 35.4 | <a href="#">2011</a>  | CP002390                                                                        |
| <b>Draft genomes</b>                                                                                      |                 |           |      |                       |                                                                                 |
| [ <i>Clostridium</i> ] <i>hiranonis</i> DSM 13275 <sup>T</sup>                                            | 2,480           | 2,123     | 31.0 | <a href="#">2045</a>  | ABWP000000000                                                                   |
| [ <i>Clostridium</i> ] <i>litorale</i> DSM 5388 <sup>T</sup>                                              | 3,405           | 3,002     | 41.3 | <a href="#">32065</a> | JJMM000000000 (Poehlein <i>et al.</i> , 2014a)                                  |
| [ <i>Clostridium</i> ] <i>mangenotii</i> TR                                                               | 3,024           | 2,699     | 31.3 | <a href="#">24505</a> | AXUS000000000 (McLaughlin <i>et al.</i> , 2014)                                 |
| [ <i>Clostridium</i> ] <i>paradoxum</i> DSM 7308 <sup>T</sup>                                             | 1,926           | 1,937     | 30.0 | <a href="#">44033</a> | LSFY000000000 (Lancaster <i>et al.</i> , 2016)                                  |
| [ <i>Eubacterium</i> ] <i>yurii</i> ATCC 43715 <sup>T</sup>                                               | 2,511           | 2,014     | 32.6 | <a href="#">2999</a>  | AEES000000000                                                                   |
| <i>Intestinibacter bartlettii</i> DSM 16795 <sup>T</sup>                                                  | 2,961           | 2,583     | 28.8 | <a href="#">961</a>   | ABEZ000000000                                                                   |
| <i>Paeniclostridium sordellii</i> ATCC 9714 <sup>T</sup>                                                  | 3,553           | 3,271     | 27.4 | <a href="#">13400</a> | APWR000000000 (Sirigi Reddy <i>et al.</i> , 2013)                               |
| <i>Paeniclostridium sordellii</i> VPI 9048 <sup>c</sup>                                                   | 3,572           | 3,985     | 27.3 | <a href="#">13400</a> | AQGJ000000000 (Sirigi Reddy <i>et al.</i> , 2013)                               |
| <i>Paraclostridium benzoelyticum</i> JC272 <sup>T</sup>                                                   | 3,556           | 3,242     | 32.2 | –                     | LBBT000000000 (Tushar <i>et al.</i> , 2015; Sasi Jyothsna <i>et al.</i> , 2016) |
| <i>Paraclostridium bifermentans</i> ATCC 638 <sup>T</sup>                                                 | 3,604           | 3,369     | 28.4 | <a href="#">15093</a> | AVNC000000000                                                                   |
| <i>Paraclostridium bifermentans</i> WYM                                                                   | 3,476           | 3,225     | 28.0 | <a href="#">15093</a> | AVSU000000000 (Wong <i>et al.</i> , 2014)                                       |
| <i>Peptostreptococcus anaerobius</i> DSM 2949 <sup>T</sup>                                                | 2,107           | 1,904     | 35.7 | <a href="#">1958</a>  | ARMA000000000                                                                   |
| <i>Proteocatella sphenisci</i> DSM 23131 <sup>T</sup>                                                     | 2,411           | 2,198     | 36.5 | <a href="#">30045</a> | AUID000000000                                                                   |
| <i>Terrisporobacter glycolicus</i> ATCC 14880 <sup>T</sup>                                                | 4,020           | 3,746     | 28.4 | <a href="#">14311</a> | AUUB000000000                                                                   |
| " <i>Clostridium dakarensis</i> " DSM 27086 <sup>T</sup>                                                  | 3,736           | 3,344     | 28.0 | <a href="#">40074</a> | CBTZ000000000 (Lo <i>et al.</i> , 2013)                                         |
| " <i>Peptoanaerobacter stomatis</i> " DSM 28705 <sup>T</sup><br>(=Peptostreptococcaceae bacterium ACC19a) | 2,544           | 2,050     | 30.3 | <a href="#">2952</a>  | AFZE000000000 (Sizova <i>et al.</i> , 2015)                                     |
| " <i>Terrisporobacter othiniensis</i> " 08-306576                                                         | 3,987           | 3,634     | 28.5 | <a href="#">36713</a> | JWHR000000000 (Lund <i>et al.</i> , 2015)                                       |
| <b><i>Clostridium sensu stricto</i></b>                                                                   |                 |           |      |                       |                                                                                 |
| <i>Clostridium butyricum</i> DSM 10702 <sup>T</sup>                                                       | 4,597           | 3,976     | 28.5 | <a href="#">1593</a>  | AQQF000000000 (Xin <i>et al.</i> , 2013)                                        |
| <i>Clostridium botulinum</i> A str. ATCC 3502                                                             | 3,903           | 3,590     | 28.2 | <a href="#">726</a>   | AM412317 (Sebahia <i>et al.</i> , 2007)                                         |

<sup>a</sup> - As of July 1<sup>st</sup>, 2016. Only those genomes used in the phylogenetic trees (Fig. 1-2, S1-S3) are listed here.

<sup>b</sup> - No suitable genomes for *Romboutsia* spp. were available at the time. *Romboutsia* sp. MT17 (GenBank: FJTZ000000000) had not been described and its 16S rRNA was only 96% identical to that of the type species *Romboutsia ilealis* DSM 25109<sup>T</sup>. Misnamed "*Clostridium lituseburense*" L74, whose genome was described by Lee *et al.* (2016), is not a member of *Peptostreptococcaceae*.

<sup>c</sup> - Draft genome of *P. sordellii* VPI 9048 only includes partial 16S rRNA sequence, which is 99% identical to that of the type strain *P. sordellii* ATCC 9714<sup>T</sup>.



**Table S2. Characteristics of the proposed *Peptoclostridium litorale* and *Peptoclostridium acidaminophilum* compared to the type species of the other *Peptostreptococcaceae* genera.**

1, *Peptoclostridium litorale* W6 = ATCC 49638<sup>T</sup> = DSM 5388<sup>T</sup> (Fendrich *et al.*, 1990; Poehlein *et al.*, 2014a); 2, *Peptoclostridium acidaminophilum* al-2 = ATCC 49065<sup>T</sup> = DSM 3953<sup>T</sup> (Zindel *et al.*, 1988; Poehlein *et al.*, 2014b). Other organisms are listed in the same order as in Figure 1: 3, *Clostridioides difficile* ATCC 9689<sup>T</sup> = DSM 1296<sup>T</sup> = JCM 1296<sup>T</sup> (data from Rainey *et al.*, 2009; Scaria *et al.*, 2015); 4, *Paraclostridium bifermentans* ATCC 638<sup>T</sup> = DSM 14991<sup>T</sup> = JCM 1386<sup>T</sup> (Chamkha *et al.*, 2001b; Sasi Jyothsna *et al.*, 2016); 5, *Paeniclostridium sordellii* ATCC 9714<sup>T</sup> = LMG 15708<sup>T</sup> = JCM 3814<sup>T</sup> (Rainey *et al.*, 2009; Scaria *et al.*, 2015; Sasi Jyothsna *et al.*, 2016); 6, *Romboutsia ilealis* CRIB<sup>T</sup> = DSM 25109<sup>T</sup> = NIZO 4048<sup>T</sup> (Gerritsen *et al.*, 2014); 7, *Asaccharospora irregularis* ATCC 25756<sup>T</sup> = DSM 2635<sup>T</sup> = JCM 1425<sup>T</sup> (Rainey *et al.*, 2009; Gerritsen *et al.*, 2014); 8, *Intestinibacter bartlettii* WAL 16138<sup>T</sup> = ATCC BAA-827<sup>T</sup> = DSM 16795<sup>T</sup> (Song *et al.*, 2004; Gerritsen *et al.*, 2014); 9, *Terrisporobacter glycolicus* ATCC 14880<sup>T</sup> = DSM 1288<sup>T</sup> = JCM 1401<sup>T</sup> (Chamkha *et al.*, 2001a; Gerritsen *et al.*, 2014); 10, *Peptostreptococcus anaerobius* ATCC 27337<sup>T</sup> = DSM 2949<sup>T</sup> = LMG 15865<sup>T</sup> (Ezaki, 2009); 11, *Acetoanaerobium noterae* NOT-3<sup>T</sup> = ATCC 35199<sup>T</sup> (Sleat *et al.*, 1985; Rainey, 2009; Bes *et al.*, 2015); 12, *Proteocatella sphenisci* ATCC BAA-755<sup>T</sup> = DSM 23131<sup>T</sup> = JCM 12175<sup>T</sup> (Pikuta *et al.*, 2009); 13, *Filifactor villosus* ATCC 33388<sup>T</sup> = DSM 1645<sup>T</sup> (Love *et al.*, 1979; Jalava & Eerola, 2009) (some data are for *Filifactor alocis*); 14, “*Peptoanaerobacter stomatis*” ACC19a<sup>T</sup> = ATCC BAA-2665<sup>T</sup> = DSM 28705<sup>T</sup> (Sizova *et al.*, 2015); 15, *Sporacetigenium mesophilum* ZLJ115<sup>T</sup> = DSM 16796<sup>T</sup> (Chen *et al.*, 2006); 16, *Tepidibacter thalassicus* SC 562<sup>T</sup> = DSM 15285<sup>T</sup> = UNIQEM 215<sup>T</sup> (Slobodkin *et al.*, 2003; Slobodkin, 2009; Tan *et al.*, 2012). The ± sign indicates reported weak reaction, empty cells indicate the absence of available data.

| Property           | Organisms |         |         |         |         |         |          |         |         |         |      |         |         |         |         |         |
|--------------------|-----------|---------|---------|---------|---------|---------|----------|---------|---------|---------|------|---------|---------|---------|---------|---------|
|                    | 1         | 2       | 3       | 4       | 5       | 6       | 7        | 8       | 9       | 10      | 11   | 12      | 13      | 14      | 15      | 16      |
| Genome size, Mb    | 3.40      | 3.06    | 4.21    | 3.60    | 3.55    |         |          | 2.96    | 4.02    | 2.11    |      | 2.41    |         | 2.54    |         |         |
| GC%                | 41.3      | 44.0    | 28.8    | 28.4    | 27.4    | 28.1    | 27       | 29.8    | 29.1    | 35.7    | 36.8 | 39.5    | 34      | 30.3    | 53.9    | 24.9    |
| Cell size, μM      |           |         |         |         |         |         |          |         |         |         |      |         |         |         |         |         |
| Width              | 1.0-1.5   | 0.7-1.0 | 0.5-1.9 | 0.5-1.9 | 0.5-1.7 | 1-2     | 0.8-1.6  | 1.0-1.5 | 0.4-1.1 | 0.8     | 0.8  | 0.7-0.8 | 0.6     | 0.4-0.8 | 0.9-1.0 | 0.7-0.9 |
| Length             | 2.0-8.0   | 1.3-6.0 | 3.0-17  | 1.5-14  | 1.6-20  | 1-5.3   | 3.5-12.6 | 5.0-50  | 2.0-15  | 0.8-0.9 | 1-5  | 3.0-5.0 | 4.0-6.0 | 1.2-2.5 | 3.6-7.3 | 3.5-6.0 |
| Cell shape         | Rods      | Rods    | Rods    | Rods    | Rods    | Rods    | Rods     | Rods    | Rods    | Cocci   | Rods | Rods    | Rods    | Rods    | Rods    | Rods    |
| Gram-staining      | -         | +       | +       | +       | +       | +       | +        | +       | +       | +       | -    | +       | ±       | +       | +       | +       |
| Spore formation    | +         | -       | +       | +       | +       | +       | +        | ±       | +       | -       | -    | +       | +       | -       | +       | +       |
| Motility           | +         | +       | +       | +       | +       | -       | +        | -       | +       | -       | +    | +       | -       | +       | +       | +       |
| Optimal temp., °C  | 28        | 32-36   | 30-37   | 30-37   | 30-37   | 37      | 30-37    | 37      | 30-37   | 37      | 37   | 29      | 37      | 37      | 37-39   | 50      |
| Optimal pH         | 7.3       | 7.1-7.4 | 6.0     | 7.0     | 6.0     | 7.0-7.5 |          |         | 7.3-7.5 |         | 7.6  | 8.3     |         | 7.0     | 7.5     | 6.5-6.8 |
| Hydrolysis of      |           |         |         |         |         |         |          |         |         |         |      |         |         |         |         |         |
| Casein             | -         |         |         | +       | +       |         | -        |         |         | -       |      |         |         |         |         | +       |
| Gelatin            | -         | -       |         | +       | +       | -       | +        | -       | -       | +       |      |         | ±       | -       | -       | -       |
| Starch             | -         |         | -       | -       |         | -       |          |         | -       |         |      | +       |         |         | +       | +       |
| Enzymes            |           |         |         |         |         |         |          |         |         |         |      |         |         |         |         |         |
| Catalase           | -         | -       | -       | -       | -       | -       |          | -       |         | -       | -    | -       |         |         | -       |         |
| Oxidase            | -         | -       | -       | -       | -       |         |          |         |         |         | -    |         |         |         | -       |         |
| Lecithinase\lipase | -         | -       | -       | +       |         | +       |          | -       | -       |         |      |         |         |         | -       |         |
| Urease             | -         | -       |         | -       | -       | -       |          | -       |         | -       |      |         |         |         | -       |         |

| Property                       | Organisms |   |   |                   |                                          |                                          |                                                  |                                          |                   |    |    |    |                                       |    |                   |                                                                         |
|--------------------------------|-----------|---|---|-------------------|------------------------------------------|------------------------------------------|--------------------------------------------------|------------------------------------------|-------------------|----|----|----|---------------------------------------|----|-------------------|-------------------------------------------------------------------------|
|                                | 1         | 2 | 3 | 4                 | 5                                        | 6                                        | 7                                                | 8                                        | 9                 | 10 | 11 | 12 | 13                                    | 14 | 15                | 16                                                                      |
| <b>Utilization of sugars</b>   |           |   |   |                   |                                          |                                          |                                                  |                                          |                   |    |    |    |                                       |    |                   |                                                                         |
| L-Arabinose                    | -         | - | - | -                 |                                          | -                                        | -                                                |                                          | -                 | -  | -  |    | -                                     | -  | +                 | -                                                                       |
| D-Cellobiose                   | -         |   | ± | -                 |                                          | -                                        |                                                  | +                                        | -                 |    | -  | -  |                                       | -  | ±                 | -                                                                       |
| D-Fructose                     | -         | - | + | +                 | +                                        | -                                        | -                                                | +                                        | +                 |    | -  | -  |                                       | -  | +                 | -                                                                       |
| D-Galactose                    | -         |   | - | -                 |                                          | +                                        | -                                                | -                                        | -                 |    | -  |    |                                       | -  | ±                 | -                                                                       |
| D-Glucose                      | -         | - | + | +                 | +                                        | +                                        | -                                                | +                                        | +                 | ±  | +  | -  | -                                     | +  | +                 | +                                                                       |
| Lactose                        | -         |   | - | -                 | -                                        | -                                        | -                                                | -                                        | -                 | -  | -  | -  | -                                     | -  | -                 |                                                                         |
| Maltose                        | -         | - | - | +                 | +                                        | -                                        | -                                                | +                                        | +                 |    | +  | -  | -                                     | +  | +                 | +                                                                       |
| D-Mannitol                     | -         |   | + | -                 | -                                        | -                                        | -                                                | +                                        | -                 | -  | -  | -  | -                                     | -  | -                 | -                                                                       |
| D-Mannose                      | -         | - | + | -                 | -                                        | -                                        | -                                                | ±                                        | -                 | ±  | -  | -  | -                                     | -  | ±                 |                                                                         |
| D-Ribose                       | -         |   | - | -                 | -                                        | -                                        | -                                                | +                                        | -                 |    | -  | -  | -                                     |    | +                 | -                                                                       |
| D-Sorbitol                     | -         |   | ± | -                 | -                                        | -                                        | -                                                | +                                        | +                 | -  | -  |    |                                       | -  | -                 | -                                                                       |
| Sucrose                        | -         | - | - | -                 | -                                        | +                                        | -                                                | +                                        | -                 | -  | -  | -  | -                                     | -  | ±                 | -                                                                       |
| D-Xylose                       | -         |   | ± | -                 | -                                        | -                                        | -                                                | -                                        | +                 |    | -  |    |                                       | -  | -                 | +                                                                       |
| <b>Reduction of</b>            |           |   |   |                   |                                          |                                          |                                                  |                                          |                   |    |    |    |                                       |    |                   |                                                                         |
| Nitrate                        | -         | - | - | -                 | -                                        |                                          |                                                  | -                                        | -                 |    |    |    |                                       |    | -                 | -                                                                       |
| Sulfate                        | -         | - |   |                   |                                          | -                                        |                                                  | -                                        | -                 |    |    |    |                                       |    |                   | -                                                                       |
| Sulfite                        | -         |   |   |                   |                                          | +                                        |                                                  | -                                        | -                 |    |    |    |                                       |    |                   | -                                                                       |
| Thiosulfate                    | -         | - |   |                   |                                          | -                                        |                                                  | -                                        | -                 |    |    |    |                                       |    |                   | -                                                                       |
| <b>Acetate production</b>      | +         | + | + |                   |                                          | +                                        | +                                                | +                                        | +                 | +  | +  | +  | +                                     | +  | +                 | +                                                                       |
| <b>H<sub>2</sub> produced</b>  | -         | ± | + | ±                 | +                                        | +                                        | ±                                                | -                                        | +                 |    | -  | ±  |                                       |    | +                 |                                                                         |
| <b>H<sub>2</sub>S produced</b> | -         |   | + | -                 |                                          |                                          |                                                  |                                          |                   |    |    |    |                                       |    | +                 | +                                                                       |
| <b>NH<sub>3</sub> produced</b> | +         | + | + |                   |                                          | +                                        | +                                                |                                          |                   |    |    |    | +                                     |    | +                 |                                                                         |
| <b>Predominant fatty acids</b> |           |   |   | C <sub>16:0</sub> | C <sub>16:0</sub> ;<br>C <sub>18:0</sub> | C <sub>16:0</sub> ;<br>C <sub>17:0</sub> | C <sub>16:0</sub> ;<br>C <sub>16:1</sub><br>1ω7C | C <sub>18:1</sub> ;<br>C <sub>16:0</sub> | C <sub>16:0</sub> |    |    |    | C <sub>14:0</sub> ; C <sub>16:0</sub> |    | C <sub>14:0</sub> | C <sub>14:0</sub> ;<br>C <sub>16:0</sub> ;<br>C <sub>16:1</sub><br>1ω7C |

**Table S3. Putative sporulation proteins in *Peptoclostridium litorale* and *P. acidaminophilum*<sup>a</sup>**

| Gene name<br>( <i>B. subtilis</i> ) | <i>Clostridium</i><br><i>litorale</i> CDS | <i>Eubacterium</i><br><i>acidamino-</i><br><i>philum</i> CDS | Iden-<br>tity, % | BLAST<br>E-value |
|-------------------------------------|-------------------------------------------|--------------------------------------------------------------|------------------|------------------|
| <i>spo0A</i>                        | <a href="#">KDR94118</a>                  | <a href="#">AHM56503</a>                                     | 49.0             | 8E-73            |
| <i>spo0J</i>                        | <a href="#">KDR96372</a>                  | <a href="#">AHM57500</a>                                     | 54.6             | 3E-71            |
| <i>sigE</i>                         | <a href="#">KDR95145</a>                  | <a href="#">AHM56685</a>                                     | 85.2             | 1E-163           |
| <i>sigF</i>                         | <a href="#">KDR96393</a>                  | <a href="#">AHM55380</a>                                     | 91.1             | 3E-137           |
| <i>spolIAA</i>                      | <a href="#">KDR96391</a>                  | <a href="#">AHM55378</a>                                     | 83.8             | 2E-48            |
| <i>spolIAB</i>                      | <a href="#">KDR96392</a>                  | <a href="#">AHM55379</a>                                     | 76.8             | 4E-61            |
| <i>spolID</i>                       | <a href="#">KDR96081</a>                  | <a href="#">AHM56263</a>                                     | 47.7             | 4E-137           |
| <i>spolIE</i>                       | <a href="#">KDR95541</a>                  | <a href="#">AHM56178</a>                                     | 81.2             | 1E-199           |
| <i>spolIQ</i>                       | <a href="#">KDR94841</a>                  | <a href="#">AHM55716</a>                                     | 63.1             | 1E-139           |
| <i>spolIJ</i>                       | <a href="#">KDR96378</a>                  | <a href="#">AHM57505</a>                                     | 76.5             | 2E-97            |
| <i>spoIVFB</i>                      | <a href="#">KDR93751</a>                  | <a href="#">AHM56979</a>                                     | 67.1             | 7E-156           |
| <i>spoVB</i>                        | <a href="#">KDR94240</a>                  | <a href="#">AHM55549</a>                                     | 75.6             | 1E-199           |
| <i>spoVC</i>                        | <a href="#">KDR94243</a>                  | <a href="#">AHM55546</a>                                     | 73.0             | 4E-72            |
| <i>spoVD</i>                        | <a href="#">KDR95016</a>                  | <a href="#">AHM56340</a>                                     | 69.5             | 1E-199           |
| <i>spoVE</i>                        | <a href="#">KDR95021</a>                  | <a href="#">AHM56345</a>                                     | 70.8             | 2E-149           |
| <i>spoVG</i>                        | <a href="#">KDR94246</a>                  | <a href="#">AHM55543</a>                                     | 81.4             | 8E-39            |
| <i>spoVS</i>                        | <a href="#">KDR95155</a>                  | <a href="#">AHM56669</a>                                     | 94.2             | 2E-42            |
| <i>abrB</i>                         | KDR94262                                  | AHM55532                                                     | 97.5             | 7E-41            |
| <i>slrR</i>                         | KDR95600                                  | AHM57621                                                     | 41.4             | 2E-35            |
| <i>alr</i>                          | KDR94822                                  | AHM55700                                                     | 74.0             | 2E-180           |
| <i>cwlD</i>                         | KDR95675                                  | AHM56020                                                     | 44.0             | 3E-96            |
| <i>dacB</i>                         | KDR94090                                  | AHM56475                                                     | 57.9             | 2E-123           |
| <i>dapA</i>                         | KDR95311                                  | AHM56886                                                     | 81.4             | 4E-139           |
| <i>dapB</i>                         | KDR95310                                  | AHM56887                                                     | 70.1             | 2E-104           |
| <i>etfA</i>                         | KDR95723                                  | AHM56121                                                     | 58.0             | 7E-160           |
| <i>obgE</i>                         | KDR94074                                  | AHM56460                                                     | 76.8             | 1E-199           |
| <i>stoA</i>                         | KDR95762                                  | AHM58259                                                     | 63.0             | 2E-50            |
| <i>sleL</i>                         | KDR96768                                  | AHM57802                                                     | 71.0             | 1E-199           |
| <i>spsC</i>                         | KDR94625                                  | AHM57300                                                     | 36.2             | 2E-66            |
| <i>spsI</i>                         | KDR94588                                  | AHM55662                                                     | 35.8             | 9E-20            |
| <i>spsJ</i>                         | KDR94586                                  | AHM57182                                                     | 26.2             | 1E-26            |
| <i>spsK</i>                         | KDR94585                                  | AHM57303                                                     | 34.8             | 4E-05            |
| <i>yerB</i>                         | KDR95388                                  | AHM56066                                                     | 41.0             | 3E-51            |
| <i>yhaX</i>                         | KDR96655                                  | AHM58049                                                     | 62.7             | 5E-103           |
| <i>ykvl</i>                         | KDR96160                                  | AHM58009                                                     | 62.3             | 1E-137           |
| <i>yoaR</i>                         | KDR95550                                  | AHM56169                                                     | 49.9             | 3E-127           |
| <i>yocH</i>                         | KDR94252                                  | AHM55538                                                     | 57.6             | 2E-108           |
| <i>yqfU</i>                         | KDR94469                                  | AHM57128                                                     | 62.7             | 5E-104           |
| <i>yqhQ</i>                         | KDR94799                                  | AHM55677                                                     | 74.9             | 2E-118           |
| <i>yviA</i>                         | KDR95547                                  | AHM56172                                                     | 63.1             | 1E-105           |
| <i>yyaC</i>                         | KDR96146                                  | AHM56310                                                     | 63.9             | 3E-69            |

<sup>a</sup> – The list of known and putative sporulation genes of *Bacillus subtilis* is taken from (Galperin *et al.*, 2012). The table lists the GenBank accession (CDS) numbers of the corresponding proteins from *C. litorale* and *E. acidaminophilum*, their identity levels and expectation values obtained from pairwise BLAST comparisons. Spo proteins are hyperlinked to their GenBank entries.

**Table S4. Recently proposed changes in the names of the *Peptostreptococcaceae* members<sup>a</sup>**

| Organism name <sup>a</sup>                         | Updated name                            | Reference                           |
|----------------------------------------------------|-----------------------------------------|-------------------------------------|
| <i>Clostridium bartlettii</i>                      | <i>Intestinibacter bartlettii</i>       | Gerritsen <i>et al.</i> (2014)      |
| <i>Clostridium bifermentans</i>                    | <i>Paraclostridium bifermentans</i>     | Sasi Jyothsna <i>et al.</i> (2016)  |
| <i>Clostridium difficile</i>                       | <i>Clostridioides difficile</i>         | Lawson <i>et al.</i> (2016)         |
| <i>Clostridium ghonii</i>                          | <i>Paeniclostridium ghonii</i>          | Sasi Jyothsna <i>et al.</i> (2016)  |
| <i>Clostridium glycolicum</i>                      | <i>Terrisporobacter glycolicus</i>      | Gerritsen <i>et al.</i> (2014)      |
| <i>Clostridium hiranonis</i>                       | –                                       | –                                   |
| <i>Clostridium irregulare</i>                      | <i>Asaccharospora irregularis</i>       | Gerritsen <i>et al.</i> (2014)      |
| <i>Clostridium litorale</i>                        | <i>Peptoclostridium litorale</i>        | This work                           |
| <i>Clostridium lituseburense</i>                   | <i>Romboutsia lituseburenensis</i>      | Gerritsen <i>et al.</i> (2014)      |
| <i>Clostridium manganotii</i>                      | <i>Clostridioides manganotii</i>        | Lawson <i>et al.</i> (2016)         |
| <i>Clostridium mayombeii</i> <sup>a</sup>          | <i>Terrisporobacter mayombeii</i>       | Gerritsen <i>et al.</i> (2014)      |
| <i>Clostridium paradoxum</i>                       | –                                       | –                                   |
| <i>Clostridium sordellii</i>                       | <i>Paeniclostridium sordellii</i>       | Sasi Jyothsna <i>et al.</i> (2016)  |
| <i>Clostridium sticklandii</i>                     | <i>Acetoanaerobium sticklandii</i>      | Bes <i>et al.</i> (2015), this work |
| <i>Clostridium thermoalcaliphilum</i> <sup>a</sup> | –                                       | –                                   |
| <i>Eubacterium acidaminophilum</i>                 | <i>Peptoclostridium acidaminophilum</i> | This work                           |
| <i>Eubacterium tenue</i>                           | –                                       | –                                   |
| <i>Eubacterium yurii</i>                           | –                                       | –                                   |

<sup>a</sup> - This table includes 15 validly described species that have been assigned to the family *Peptostreptococcaceae* in the 2<sup>nd</sup> edition of Bergey's (Ludwig *et al.*, 2009) with the addition of two more species, *C. mayombeii* and *C. thermoalcaliphilum* (Kane *et al.*, 1991; Li *et al.*, 1994), which had been assigned to Cluster XI by Collins *et al.* (1994), but not assigned to *Peptostreptococcaceae* in Bergey's (Ludwig *et al.*, 2009; Rainey *et al.*, 2009). *Eubacterium acidaminophilum* was not mentioned by either Collins *et al.* (1994) or Ludwig *et al.* (2009). A dash indicates that the organism's name remains to be updated.

**Table S5. Updated nomenclature of the family *Peptostreptococcaceae*<sup>a</sup>**

| Organism name <sup>a</sup>              | Comment, reference                                                                                                                                                                                                                               |
|-----------------------------------------|--------------------------------------------------------------------------------------------------------------------------------------------------------------------------------------------------------------------------------------------------|
| <b><i>Acetoanaerobium</i></b>           | This genus has been assigned to <i>Clostridiales</i> Family XIX <i>Incertae Sedis</i> in Bergey's (Ludwig <i>et al.</i> , 2009; Rainey, 2009) but listed within <i>Peptostreptococcaceae</i> in the SILVA database (Yilmaz <i>et al.</i> , 2014) |
| <i>Acetoanaerobium noterae</i>          | Sleat <i>et al.</i> (1985); Rainey (2009)                                                                                                                                                                                                        |
| <i>Acetoanaerobium pronyense</i>        | Bes <i>et al.</i> (2015)                                                                                                                                                                                                                         |
| <i>Acetoanaerobium sticklandii</i>      | Recognized as a close relative of <i>A. pronyense</i> by Bes <i>et al.</i> (2015), reclassification proposed in in this work                                                                                                                     |
| <b><i>Asaccharospora</i></b>            | This genus was first proposed in Gerritsen <i>et al.</i> (2014)                                                                                                                                                                                  |
| <i>Asaccharospora irregularis</i>       | Gerritsen <i>et al.</i> (2014)                                                                                                                                                                                                                   |
| <b><i>Clostridioides</i></b>            | This genus was first proposed in Lawson <i>et al.</i> (2016)                                                                                                                                                                                     |
| <i>Clostridioides difficile</i>         | Lawson <i>et al.</i> (2016)                                                                                                                                                                                                                      |
| <i>Clostridioides manganotii</i>        | Lawson <i>et al.</i> (2016)                                                                                                                                                                                                                      |
| <b><i>Filifactor</i></b>                | Jalava & Eerola (2009)                                                                                                                                                                                                                           |
| <i>Filifactor alocis</i>                | Jalava & Eerola (2009)                                                                                                                                                                                                                           |
| <i>Filifactor villosus</i>              | Jalava & Eerola (2009)                                                                                                                                                                                                                           |
| <b><i>Intestinibacter</i></b>           | This genus was first proposed in Gerritsen <i>et al.</i> (2014)                                                                                                                                                                                  |
| <i>Intestinibacter bartlettii</i>       | Gerritsen <i>et al.</i> (2014)                                                                                                                                                                                                                   |
| <b><i>Paeniclostridium</i></b>          | This genus was first proposed in Sasi Jyothsna <i>et al.</i> (2016)                                                                                                                                                                              |
| <i>Paeniclostridium ghonii</i>          | Sasi Jyothsna <i>et al.</i> (2016)                                                                                                                                                                                                               |
| <i>Paeniclostridium sordelii</i>        | Sasi Jyothsna <i>et al.</i> (2016)                                                                                                                                                                                                               |
| <b><i>Paraclostridium</i></b>           | This genus was first proposed in Sasi Jyothsna <i>et al.</i> (2016)                                                                                                                                                                              |
| <i>Paraclostridium benzoelyticum</i>    | Sasi Jyothsna <i>et al.</i> (2016)                                                                                                                                                                                                               |
| <i>Paraclostridium bifermentans</i>     | Sasi Jyothsna <i>et al.</i> (2016)                                                                                                                                                                                                               |
| <b><i>Peptoanaerobacter</i></b>         | Described as a new genus in Sizova <i>et al.</i> (2015), not recognized as validly described at the time of this writing                                                                                                                         |
| <i>Peptoanaerobacter stomatis</i>       | Sizova <i>et al.</i> (2015)                                                                                                                                                                                                                      |
| <b><i>Peptoclostridium</i></b>          | This genus was first proposed in Yutin & Galperin (2013), the proposal modified in this work                                                                                                                                                     |
| <i>Peptoclostridium acidaminophilum</i> | Zindel <i>et al.</i> (1988); this work                                                                                                                                                                                                           |
| <i>Peptoclostridium litorale</i>        | Fendrich <i>et al.</i> (1990); Rainey <i>et al.</i> (2009); this work                                                                                                                                                                            |
| <b><i>Peptostreptococcus</i></b>        | Ezaki (2009)                                                                                                                                                                                                                                     |
| <i>Peptostreptococcus anaerobius</i>    | Paster <i>et al.</i> (1993); Ezaki (2009)                                                                                                                                                                                                        |
| <i>Peptostreptococcus canis</i>         | Lawson <i>et al.</i> (2012)                                                                                                                                                                                                                      |
| <i>Peptostreptococcus russellii</i>     | Whitehead <i>et al.</i> (2011)                                                                                                                                                                                                                   |
| <i>Peptostreptococcus stomatis</i>      | Downes & Wade (2006)                                                                                                                                                                                                                             |

---

|                                             |                                                                                                                                                                                                   |
|---------------------------------------------|---------------------------------------------------------------------------------------------------------------------------------------------------------------------------------------------------|
| <b>Proteocatella</b>                        | Described as a new genus in Cluster XI by Pikuta <i>et al.</i> (2009); listed in <i>Peptostreptococcaceae</i> in SILVA but in ‘unclassified Clostridiales’ in the NCBI Taxonomy database          |
| <i>Proteocatella sphenisci</i>              | Pikuta <i>et al.</i> (2009)                                                                                                                                                                       |
| <b>Romboutsia</b>                           | This genus was first proposed in Gerritsen <i>et al.</i> (2014)                                                                                                                                   |
| <i>Romboutsia ilealis</i>                   | Gerritsen <i>et al.</i> (2014)                                                                                                                                                                    |
| <i>Romboutsia lituseburensis</i>            | Gerritsen <i>et al.</i> (2014)                                                                                                                                                                    |
| <i>Romboutsia sedimentorum</i>              | Wang <i>et al.</i> (2015)                                                                                                                                                                         |
| <b>Sporacetigenium</b>                      | Chen <i>et al.</i> (2006)                                                                                                                                                                         |
| <i>Sporacetigenium mesophilum</i>           | Chen <i>et al.</i> (2006)                                                                                                                                                                         |
| <b>Tepidibacter</b>                         | Slobodkin <i>et al.</i> (2003); Slobodkin (2009); Tan <i>et al.</i> (2012)                                                                                                                        |
| <i>Tepidibacter formicigenes</i>            | Urios <i>et al.</i> (2004); Slobodkin (2009)                                                                                                                                                      |
| <i>Tepidibacter mesophilus</i>              | Tan <i>et al.</i> (2012)                                                                                                                                                                          |
| <i>Tepidibacter thalassicus</i>             | Slobodkin <i>et al.</i> (2003); Slobodkin (2009)                                                                                                                                                  |
| <b>Terrisporobacter</b>                     | This genus was first proposed in Gerritsen <i>et al.</i> (2014)                                                                                                                                   |
| <i>Terrisporobacter glycolicus</i>          | Gerritsen <i>et al.</i> (2014)                                                                                                                                                                    |
| <i>Terrisporobacter mayombeii</i>           | Gerritsen <i>et al.</i> (2014)                                                                                                                                                                    |
| “ <i>Terrisporobacter othiniensis</i> ”     | Lund <i>et al.</i> (2015)                                                                                                                                                                         |
| <i>Terrisporobacter petrolearius</i>        | Deng <i>et al.</i> (2015)                                                                                                                                                                         |
| <b>Unassigned [<i>Clostridium</i>] spp.</b> |                                                                                                                                                                                                   |
| <i>[Clostridium] hiranonis</i>              | Kitahara <i>et al.</i> (2001); Rainey <i>et al.</i> (2009)                                                                                                                                        |
| <i>[Clostridium] paradoxum</i>              | Li <i>et al.</i> (1993); Rainey <i>et al.</i> (2009)                                                                                                                                              |
| <i>[Clostridium] thermoalcaliphilum</i>     | Li <i>et al.</i> (1994); Rainey <i>et al.</i> (2009)                                                                                                                                              |
| <b>Unassigned [<i>Eubacterium</i>] spp.</b> |                                                                                                                                                                                                   |
| <i>Eubacterium tenue</i>                    | Recognized as a close relative of <i>Paeniclostridium ghonii</i> by Gerritsen <i>et al.</i> (2014) and Sasi Jyothsna <i>et al.</i> (2016), could be reclassified as <i>Paeniclostridium tenue</i> |
| <i>Eubacterium yurii</i>                    | Recognized as a close relative of <i>Peptoanaerobacter stomatis</i> by Sizova <i>et al.</i> (2015), could be reclassified as <i>Peptoanaerobacter yurii</i>                                       |
| <b>Organisms without valid description</b>  |                                                                                                                                                                                                   |
| “ <i>Clostridium dakarensis</i> ”           | Deposited in DSM (DSM 27086) and CSUR (CSUR P243), can be reassigned as <i>Romboutsia dakarensis</i> (Lo <i>et al.</i> , 2013)                                                                    |
| “ <i>Clostridium maritimum</i> ”            | <i>Romboutsia sp.</i> , not deposited in any culture collection                                                                                                                                   |
| “ <i>Clostridium metallolevans</i> ”        | <i>Terrisporobacter sp.</i> , not deposited in any culture collection                                                                                                                             |
| “ <i>Clostridium ruminantium</i> ”          | <i>Romboutsia sp.</i> , not deposited in any culture collection                                                                                                                                   |
| “ <i>Clostridium venationis</i> ”           | <i>Clostridioides mangenotii</i> , not deposited in any collection                                                                                                                                |

---

<sup>a</sup> This listing takes into account the classification presented in the 2<sup>nd</sup> edition of Bergey’s (Ludwig *et al.*, 2009) and subsequent proposals and assignments, see Figure 1 and the entries in SILVA database <https://www.arb-silva.de/browser/ssu-126/AB075770> (Quast *et al.*, 2013; Yilmaz *et al.*, 2014) and the NCBI Taxonomy Database <http://www.ncbi.nlm.nih.gov/Taxonomy/Browser/wwwtax.cgi?id=186804> (Federhen, 2012, 2015).

## References

- Benson, D. A., Clark, K., Karsch-Mizrachi, I., Lipman, D. J., Ostell, J. & Sayers, E. W. (2015). GenBank. *Nucleic Acids Res* **43**: D30-D35.
- Bes, M., Merrouch, M., Joseph, M., Quemeneur, M., Payri, C., Pelletier, B., Ollivier, B., Fardeau, M. L., Erauso, G. & other authors (2015). *Acetoanaerobium pronyense* sp. nov., an anaerobic alkaliphilic bacterium isolated from a carbonate chimney of the Prony Hydrothermal Field (New Caledonia). *Int J Syst Evol Microbiol* **65**: 2574-2580.
- Chamkha, M., Labat, M., Patel, B. K. & Garcia, J. L. (2001a). Isolation of a cinnamic acid-metabolizing *Clostridium glycolicum* strain from oil mill wastewaters and emendation of the species description. *Int J Syst Evol Microbiol* **51**: 2049-2054.
- Chamkha, M., Patel, B. K. C., Garcia, J. L. & Labat, M. (2001b). Isolation of *Clostridium bifermentans* from oil mill wastewaters converting cinnamic acid to 3-phenylpropionic acid and emendation of the species. *Anaerobe* **7**: 189-197.
- Chen, S., Song, L. & Dong, X. (2006). *Sporacetigenium mesophilum* gen. nov., sp. nov., isolated from an anaerobic digester treating municipal solid waste and sewage. *Int J Syst Evol Microbiol* **56**: 721-725.
- Collins, M. D., Lawson, P. A., Willems, A., Cordoba, J. J., Fernandez-Garayzabal, J., Garcia, P., Cai, J., Hippe, H. & Farrow, J. A. E. (1994). The phylogeny of the genus *Clostridium*: proposal of five new genera and eleven new species combinations. *Int J Syst Bacteriol* **44**: 812-826.
- Deloger, M., El Karoui, M. & Petit, M. A. (2009). A genomic distance based on MUM indicates discontinuity between most bacterial species and genera. *J Bacteriol* **191**: 91-99.
- Deng, Y., Guo, X., Wang, Y., He, M., Ma, K., Wang, H., Chen, X., Kong, D., Yang, Z. & other authors (2015). *Terrisporobacter petrolearius* sp. nov., isolated from an oilfield petroleum reservoir. *Int J Syst Evol Microbiol* **65**: 3522-3526.
- Downes, J. & Wade, W. G. (2006). *Peptostreptococcus stomatis* sp. nov., isolated from the human oral cavity. *Int J Syst Evol Microbiol* **56**: 751-754.
- Edgar, R. C. (2004). MUSCLE: multiple sequence alignment with high accuracy and high throughput. *Nucleic Acids Res* **32**: 1792-1797.
- Ezaki, T. (2009) Genus I. *Peptostreptococcus*. In *Bergey's Manual of Systematic Bacteriology, 2nd edn, vol 3: The Firmicutes*, pp. 1008-1009. Edited by P. De Vos, G. M. Garrity, D. Jones, N. R. Krieg, W. Ludwig, F. A. Rainey, K.-H. Schleifer & W. B. Whitman. New York: Springer.
- Federhen, S. (2012). The NCBI Taxonomy database. *Nucleic Acids Res* **40**: D136-D143.
- Federhen, S. (2015). Type material in the NCBI Taxonomy Database. *Nucleic Acids Res* **43**: D1086-D1098.
- Fendrich, C., Hippe, H. & Gottschalk, G. (1990). *Clostridium halophilium* sp. nov. and *C. litorale* sp. nov., an obligate halophilic and a marine species degrading betaine in the Stickland reaction *Arch Microbiol* **154**: 127-132.
- Fonknechten, N., Chaussonnerie, S., Tricot, S., Lajus, A., Andreesen, J. R., Perchat, N., Pelletier, E., Gouyvenoux, M., Barbe, V. & other authors (2010). *Clostridium sticklandii*, a specialist in amino acid degradation: revisiting its metabolism through its genome sequence. *BMC Genomics* **11**: 555.
- Galperin, M. Y., Mekhedov, S. L., Puigbo, P., Smirnov, S., Wolf, Y. I. & Rigden, D. J. (2012). Genomic determinants of sporulation in *Bacilli* and *Clostridia*: towards the minimal set of sporulation-specific genes. *Environ Microbiol* **14**: 2870-2890.

- Gerritsen, J., Fuentes, S., Grievink, W., van Niftrik, L., Tindall, B. J., Timmerman, H. M., Rijkers, G. T. & Smidt, H. (2014).** Characterization of *Romboutsia ilealis* gen. nov., sp. nov., isolated from the gastrointestinal tract of a rat, and proposal for the reclassification of five closely related members of the genus *Clostridium* into the genera *Romboutsia* gen. nov., *Intestinibacter* gen. nov., *Terrisporobacter* gen. nov. and *Asaccharospora* gen. nov. *Int J Syst Evol Microbiol* **64**: 1600-1616.
- Goris, J., Konstantinidis, K. T., Klappenbach, J. A., Coenye, T., Vandamme, P. & Tiedje, J. M. (2007).** DNA-DNA hybridization values and their relationship to whole-genome sequence similarities. *Int J Syst Evol Microbiol* **57**: 81-91.
- Guindon, S., Dufayard, J. F., Lefort, V., Anisimova, M., Hordijk, W. & Gascuel, O. (2010).** New algorithms and methods to estimate maximum-likelihood phylogenies: assessing the performance of PhyML 3.0. *Syst Biol* **59**: 307-321.
- Jalava, J. & Eerola, E. (2009)** Genus II. *Filifactor*. In *Bergey's Manual of Systematic Bacteriology, 2nd edn, vol 3: The Firmicutes*, pp. 1009-1013. Edited by P. De Vos, G. M. Garrity, D. Jones, N. R. Krieg, W. Ludwig, F. A. Rainey, K.-H. Schleifer & W. B. Whitman. New York: Springer.
- Kane, M. D., Brauman, A. & Breznak, J. A. (1991).** *Clostridium mayombei* sp. nov., an H<sub>2</sub>/CO<sub>2</sub> acetogenic bacterium from the gut of the African soil-feeding termite, *Cubitermes speciosus*. *Arch Microbiol* **156**: 99-104.
- Kitahara, M., Takamine, F., Imamura, T. & Benno, Y. (2001).** *Clostridium hiranonis* sp. nov., a human intestinal bacterium with bile acid 7 $\alpha$ -dehydroxylating activity. *Int J Syst Evol Microbiol* **51**: 39-44.
- Lancaster, W. A., Utturkar, S. M., Poole, F. L., Klingeman, D. M., Elias, D. A., Adams, M. W. & Brown, S. D. (2016).** Near-complete genome sequence of *Clostridium paradoxum* strain JW-YL-7. *Genome Announc* **4**: e00229-00216.
- Lawson, P. A., Johnson, C. N., Bengtsson, L., Charalampakis, G., Dahlen, G., Moore, E. & Falsen, E. (2012).** *Peptostreptococcus canis* sp. nov., isolated from subgingival plaque from canine oral cavity. *Anaerobe* **18**: 597-601.
- Lawson, P. A., Citron, D. M., Tyrrell, K. L. & Finegold, S. M. (2016).** Reclassification of *Clostridium difficile* as *Clostridioides difficile* (Hall and O'Toole 1935) Prevot 1938. *Anaerobe* **40**: 95-99.
- Lee, Y., Lim, S., Rhee, M. S., Chang, D. H. & Kim, B. C. (2016).** Whole-genome sequence of *Clostridium lituseburense* L74, isolated from the larval gut of the rhinoceros beetle, *Trypoxylus dichotomus*. *Genom Data* **7**: 301-302.
- Li, Y., Mandelco, L. & Wiegel, J. (1993).** Isolation and characterization of a moderately thermophilic anaerobic alkaliphile, *Clostridium paradoxum* sp. nov. *Int J Syst Bacteriol* **43**: 450-460.
- Li, Y., Engle, M., Weiss, N., Mandelco, L. & Wiegel, J. (1994).** *Clostridium thermoalcaliphilum* sp. nov., an anaerobic and thermotolerant facultative alkaliphile. *Int J Syst Bacteriol* **44**: 111-118.
- Lo, C. I., Mishra, A. K., Padhmanabhan, R., Samb, B., Sow, A. G., Robert, C., Couderc, C., Faye, N., Raoult, D. & other authors (2013).** Non-contiguous finished genome sequence and description of *Clostridium dakarensis* sp. nov. *Stand Genomic Sci* **9**: 14-27.
- Love, D. N., Jones, R. F. & Bailey, M. (1979).** *Clostridium villosum* sp. nov. from subcutaneous abscesses in cats. *Int J Syst Bacteriol* **29**: 241-244.
- Ludwig, W., Schleifer, K.-H. & Whitman, W. B. (2009)** Taxonomic outline of the phylum Firmicutes. In *Bergey's Manual of Systematic Bacteriology, 2nd ed, Vol 3: The Firmicutes*, pp. 15-17. Edited by P.



De Vos, G. M. Garrity, D. Jones, N. R. Krieg, W. Ludwig, F. A. Rainey, K.-H. Schleifer & W. B. Whitman. New York: Springer.

- Lund, L. C., Sydenham, T. V., Hogh, S. V., Skov, M., Kemp, M. & Justesen, U. S. (2015).** Draft genome sequence of "*Terrisporobacter othiniensis*" isolated from a blood culture from a human patient. *Genome Announc* **3**: e00042-00015.
- McLaughlin, R. W., Cochran, P. A., Dowd, S. E., Andersen, K., Anderson, N., Brennan, R., Brook, N., Callaway, T., Diamante, K. & other authors (2014).** Draft genome sequence of *Clostridium mangenotii* TR, isolated from the fecal material of a timber rattlesnake. *Genome Announc* **2**: e01107-01113.
- Monot, M., Boursaux-Eude, C., Thibonnier, M., Vallenet, D., Moszer, I., Medigue, C., Martin-Verstraete, I. & Dupuy, B. (2011).** Reannotation of the genome sequence of *Clostridium difficile* strain 630. *J Med Microbiol* **60**: 1193-1199.
- Morgulis, A., Coulouris, G., Raytselis, Y., Madden, T. L., Agarwala, R. & Schäffer, A. A. (2008).** Database indexing for production MegaBLAST searches. *Bioinformatics* **24**: 1757-1764.
- Parte, A. C. (2014).** LPSN--list of prokaryotic names with standing in nomenclature. *Nucleic Acids Res* **42**: D613-D616.
- Paster, B. J., Russell, J. B., Yang, C. M., Chow, J. M., Woese, C. R. & Tanner, R. (1993).** Phylogeny of the ammonia-producing ruminal bacteria *Peptostreptococcus anaerobius*, *Clostridium sticklandii*, and *Clostridium aminophilum* sp. nov. *Int J Syst Bacteriol* **43**: 107-110.
- Pikuta, E. V., Hoover, R. B., Marsic, D., Whitman, W. B., Lupa, B., Tang, J. & Krader, P. (2009).** *Proteocatella sphenisci* gen. nov., sp. nov., a psychrotolerant, spore-forming anaerobe isolated from penguin guano. *Int J Syst Evol Microbiol* **59**: 2302-2307.
- Poehlein, A., Alghaithi, H. S., Chandran, L., Chibani, C. M., Davydova, E., Dhamotharan, K., Ge, W., Gutierrez-Gutierrez, D. A., Jagirdar, A. & other authors (2014a).** First insights into the genome of the amino acid-metabolizing bacterium *Clostridium litorale* DSM 5388. *Genome Announc* **2**: e00754-00714.
- Poehlein, A., Andreesen, J. R. & Daniel, R. (2014b).** Complete genome sequence of amino acid-utilizing *Eubacterium acidaminophilum* al-2 (DSM 3953). *Genome Announc* **2**: e00573-00514.
- Quast, C., Pruesse, E., Yilmaz, P., Gerken, J., Schweer, T., Yarza, P., Peplies, J. & Glockner, F. O. (2013).** The SILVA ribosomal RNA gene database project: improved data processing and web-based tools. *Nucleic Acids Res* **41**: D590-D596.
- Rainey, F. A. (2009)** Genus I. *Acetoanaerobium*. In *Bergey's Manual of Systematic Bacteriology, 2nd edn, vol 3: The Firmicutes*, pp. 1190-1191. Edited by P. De Vos, G. M. Garrity, D. Jones, N. R. Krieg, W. Ludwig, F. A. Rainey, K.-H. Schleifer & W. B. Whitman. New York: Springer.
- Rainey, F. A., Hollen, B. J. & Small, A. (2009)** Genus I. *Clostridium*. In *Bergey's Manual of Systematic Bacteriology, 2nd ed, Volume 3: The Firmicutes*, pp. 738-828. Edited by P. De Vos, G. M. Garrity, D. Jones, N. R. Krieg, W. Ludwig, F. A. Rainey, K.-H. Schleifer & W. B. Whitman. New York: Springer.
- Riedel, T., Bunk, B., Wittmann, J., Thurmer, A., Sproer, C., Gronow, S., Liesegang, H., Daniel, R. & Overmann, J. (2015).** Complete genome sequence of the *Clostridium difficile* type strain DSM 1296<sup>T</sup>. *Genome Announc* **3**: e01186-01115.
- Sasi Jyothsna, T. S., Tushar, L., Sasikala, C. & Ramana, C. V. (2016).** *Paraclostridium benzoelyticum* gen. nov. sp. nov., isolated from marine sediment and reclassification of *Clostridium bifermentans* as

- Paraclostridium bifermentans* comb. nov. Proposal of a new genus *Paeniclostridium* gen. nov. to accommodate *Clostridium sordellii* and *Clostridium ghonii*. *Int J Syst Evol Microbiol* **66**: 1268-1274.
- Scaria, J., Suzuki, H., Ptak, C. P., Chen, J. W., Zhu, Y., Guo, X. K. & Chang, Y. F. (2015).** Comparative genomic and phenomic analysis of *Clostridium difficile* and *Clostridium sordellii*, two related pathogens with differing host tissue preference. *BMC Genomics* **16**: 448.
- Sebahia, M., Wren, B. W., Mullany, P., Fairweather, N. F., Minton, N., Stabler, R., Thomson, N. R., Roberts, A. P., Cerdeno-Tarraga, A. M. & other authors (2006).** The multidrug-resistant human pathogen *Clostridium difficile* has a highly mobile, mosaic genome. *Nat Genet* **38**: 779-786.
- Sebahia, M., Peck, M. W., Minton, N. P., Thomson, N. R., Holden, M. T., Mitchell, W. J., Carter, A. T., Bentley, S. D., Mason, D. R. & other authors (2007).** Genome sequence of a proteolytic (Group I) *Clostridium botulinum* strain Hall A and comparative analysis of the clostridial genomes. *Genome Res* **17**: 1082-1092.
- Sirigi Reddy, A. R., Girinathan, B. P., Zapotocny, R. & Govind, R. (2013).** Identification and characterization of *Clostridium sordellii* toxin gene regulator. *J Bacteriol* **195**: 4246-4254.
- Sizova, M. V., Chilaka, A., Earl, A. M., Doerfert, S. N., Muller, P. A., Torralba, M., McCorrison, J. M., Durkin, A. S., Nelson, K. E. & other authors (2015).** High-quality draft genome sequences of five anaerobic oral bacteria and description of *Peptoanaerobacter stomatis* gen. nov., sp. nov., a new member of the family *Peptostreptococcaceae*. *Stand Genomic Sci* **10**: 37.
- Sleat, R., Mah, R. A. & Robinson, R. (1985).** *Acetoanaerobium noterae* gen. nov., sp. nov.: an anaerobic bacterium that forms acetate from H<sub>2</sub> and CO<sub>2</sub>. *Int J Syst Bacteriol* **35**: 10-15.
- Slobodkin, A. I., Tourova, T. P., Kostrikina, N. A., Chernyh, N. A., Bonch-Osmolovskaya, E. A., Jeanthon, C. & Jones, B. E. (2003).** *Tepidibacter thalassicus* gen. nov., sp. nov., a novel moderately thermophilic, anaerobic, fermentative bacterium from a deep-sea hydrothermal vent. *Int J Syst Evol Microbiol* **53**: 1131-1134.
- Slobodkin, A. I. (2009)** Genus III. *Tepidibacter*. In *Bergey's Manual of Systematic Bacteriology, 2nd edn, vol 3, The Firmicutes*, pp. 1013-1015. Edited by P. De Vos, G. M. Garrity, D. Jones, N. R. Krieg, W. Ludwig, F. A. Rainey, K.-H. Schleifer & W. B. Whitman. New York: Springer.
- Song, Y. L., Liu, C. X., McTeague, M., Summanen, P. & Finegold, S. M. (2004).** *Clostridium bartlettii* sp. nov., isolated from human faeces. *Anaerobe* **10**: 179-184.
- Tamura, K. & Nei, M. (1993).** Estimation of the number of nucleotide substitutions in the control region of mitochondrial DNA in humans and chimpanzees. *Mol Biol Evol* **10**: 512-526.
- Tamura, K., Stecher, G., Peterson, D., Filipowski, A. & Kumar, S. (2013).** MEGA6: Molecular Evolutionary Genetics Analysis version 6.0. *Mol Biol Evol* **30**: 2725-2729.
- Tan, H. Q., Wu, X. Y., Zhang, X. Q., Wu, M. & Zhu, X. F. (2012).** *Tepidibacter mesophilus* sp. nov., a mesophilic fermentative anaerobe isolated from soil polluted by crude oil, and emended description of the genus *Tepidibacter*. *Int J Syst Evol Microbiol* **62**: 66-70.
- Tushar, L., Sasi Jyothsna, T. S., Sasikala, C. & Ramana, C. V. (2015).** Draft genome sequence of antimicrobial-producing *Clostridium* sp. JC272, isolated from marine sediment. *Genome Announc* **3**: e00650-00615.
- Urios, L., Cueff, V., Pignet, P. & Barbier, G. (2004).** *Tepidibacter formicigenes* sp. nov., a novel spore-forming bacterium isolated from a Mid-Atlantic Ridge hydrothermal vent. *Int J Syst Evol Microbiol* **54**: 439-443.

- Varghese, N. J., Mukherjee, S., Ivanova, N., Konstantinidis, K. T., Mavrommatis, K., Kyripides, N. C. & Pati, A. (2015).** Microbial species delineation using whole genome sequences. *Nucleic Acids Res* **43**: 6761-6771.
- Wang, Y., Song, J., Zhai, Y., Zhang, C., Gerritsen, J., Wang, H., Chen, X., Li, Y., Zhao, B. & other authors (2015).** *Romboutsia sedimentorum* sp. nov., isolated from an alkaline-saline lake sediment and emended description of the genus *Romboutsia*. *Int J Syst Evol Microbiol* **65**: 1193-1198.
- Whitehead, T. R., Cotta, M. A., Falsen, E., Moore, E. & Lawson, P. A. (2011).** *Peptostreptococcus russellii* sp. nov., isolated from a swine-manure storage pit. *Int J Syst Evol Microbiol* **61**: 1875-1879.
- Wong, Y. M., Juan, J. C., Gan, H. M. & Austin, C. M. (2014).** Draft genome sequence of *Clostridium bifermentans* strain WYM, a promising biohydrogen producer isolated from landfill leachate sludge. *Genome Announc* **2**: e00077-00014.
- Xin, B., Tao, F., Wang, Y., Gao, C., Ma, C. & Xu, P. (2013).** Genome sequence of *Clostridium butyricum* strain DSM 10702, a promising producer of biofuels and biochemicals. *Genome Announc* **1**: e00563-00513.
- Yilmaz, P., Parfrey, L. W., Yarza, P., Gerken, J., Pruesse, E., Quast, C., Schweer, T., Peplies, J., Ludwig, W. & other authors (2014).** The SILVA and "All-species Living Tree Project (LTP)" taxonomic frameworks. *Nucleic Acids Res* **42**: D643-648.
- Yutin, N., Puigbo, P., Koonin, E. V. & Wolf, Y. I. (2012).** Phylogenomics of prokaryotic ribosomal proteins. *PLoS One* **7**: e36972.
- Yutin, N. & Galperin, M. Y. (2013).** A genomic update on clostridial phylogeny: Gram-negative spore formers and other misplaced clostridia. *Environ Microbiol* **15**: 2631-2641.
- Zindel, U., Freudenberg, W., Rieth, M., Andreesen, J. R., Schnell, J. & Widdel, F. (1988).** *Eubacterium acidaminophilum* sp. nov., a versatile amino acid-degrading anaerobe producing or utilizing H<sub>2</sub> or formate. Description and enzymatic studies. *Arch Microbiol* **150**: 254-266.
